# Supplementary material
Source: Springer Nature journal article supplement (https://www.springermedizin.de/resource/supplementary/12899_2009_151_MOESM3_ESM.pdf/9514590)

# Skeletal Muscle

## A

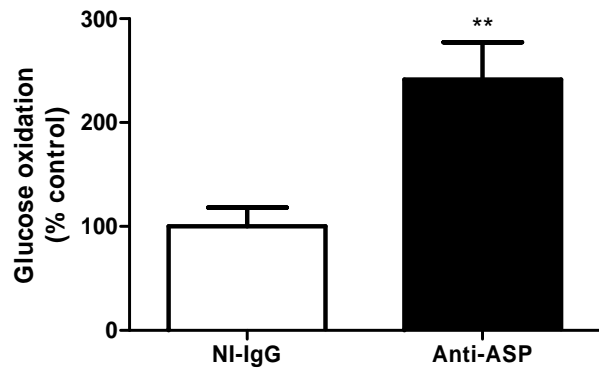

## B

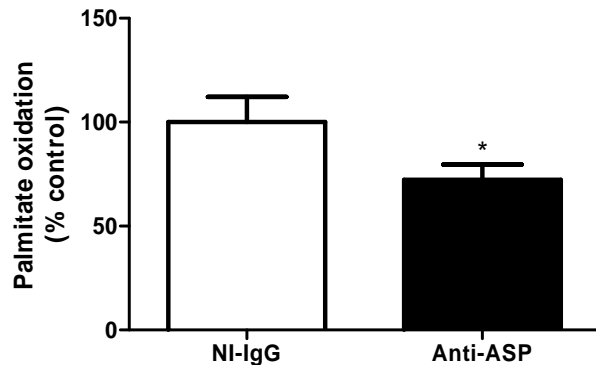

## C

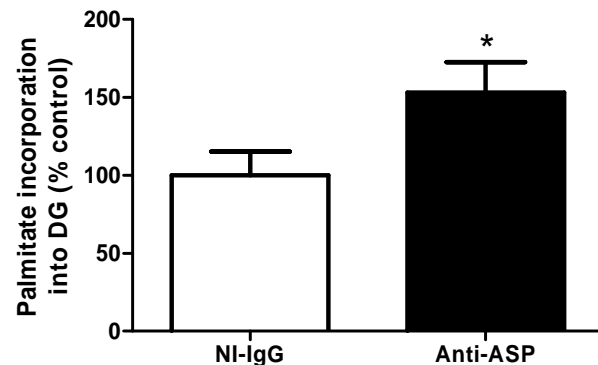

# Liver

## D

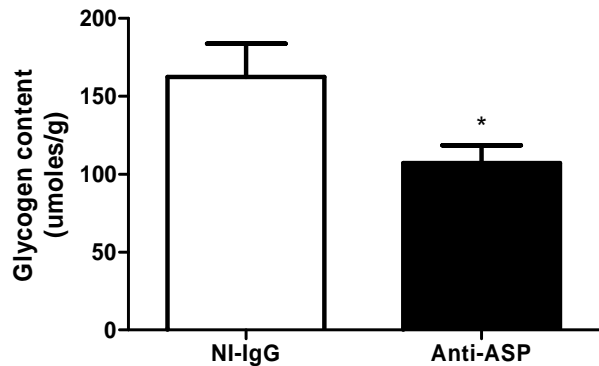

## E

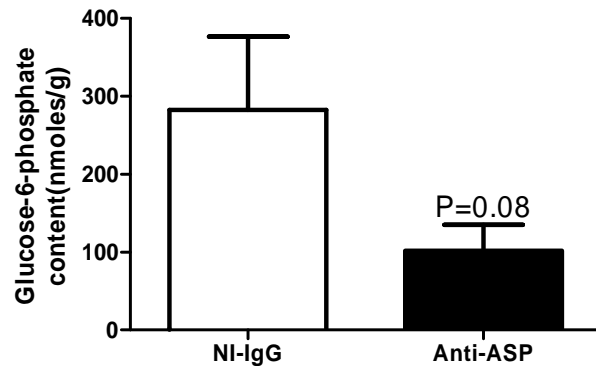

## F

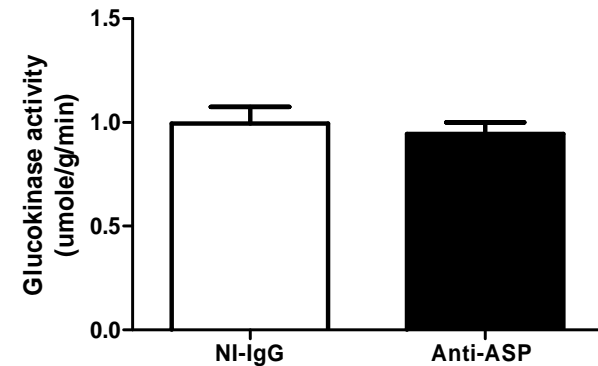

Supplement: MOESM3 [file 9514590]
